# Supplementary material
Source: MDPI journal article supplement (https://www.mdpi.com/2073-4344/13/3/460)

*Supplementary Materials*

**Table S1.** Effect of subsequently coagulation on Fenton reaction and reduction/HDC using Al-Ni alloy.

| Entry | Applied degradation method                                  | Quantity of used reagents per 0.05 mmol of MB9 in 200 mL H <sub>2</sub> O                                         | Reaction time | Decoloration | COD removal                   |
|-------|-------------------------------------------------------------|-------------------------------------------------------------------------------------------------------------------|---------------|--------------|-------------------------------|
| 1     | Fenton reaction (pH = 2.18)                                 | 6 mmol H <sub>2</sub> O <sub>2</sub><br>+ 0.2 mmol FeSO <sub>4</sub><br>+ 3.6 mmol H <sub>2</sub> SO <sub>4</sub> | 3 hours       | 86.1 %       | 37.6 %                        |
| 2     | Coagulation after Fenton reaction (pH = 7)                  | Entry 1<br>+ 18 mmol NaOH                                                                                         | 1 hour        | >99 %        | 57.1 %                        |
| 3     | Chemical reduction Raney Al-Ni (pH = 12.1)                  | 5 mmol Al in Al-Ni alloy<br>+ 24 mmol NaOH                                                                        | 3 hours       | 96.9 %       | 0 % of COD<br>(94.5 % of AOX) |
| 4     | Coagulation after chemical reduction Raney Al-Ni (pH = 6.5) | Entry 3<br>+ 8 mmol H <sub>2</sub> SO <sub>4</sub>                                                                | 1 hour        | >99 %        | 15.5 %                        |

**Table S2.** A comparison of economic viability of MB9 removal using different oxidative/reductive agents.

| Applied degradation method                                                             | Quantity of used reagents per mol of MB9                                                                                      | Price of method per mol of MB9 * | Ref.       |
|----------------------------------------------------------------------------------------|-------------------------------------------------------------------------------------------------------------------------------|----------------------------------|------------|
| Fenton oxidation                                                                       | 28 mol H <sub>2</sub> SO <sub>4</sub><br>120 mol H <sub>2</sub> O <sub>2</sub><br>+ 4 mol FeSO <sub>4</sub>                   | 425 \$                           | [52-54]    |
| Chemical reduction<br>ZVI                                                              | 150 mol Fe <sup>0</sup><br>800 mol H <sub>2</sub> SO <sub>4</sub>                                                             | 266 \$                           | [52,56]    |
| Chemical reduction<br>Al <sup>0</sup> powder                                           | 200 mol Al <sup>0</sup><br>100 mol NaOH                                                                                       | 215 \$                           | [57,58]    |
| Chemical reduction<br>Al <sup>0</sup> powder<br>+ Ni <sup>0</sup> powder               | 200 mol Al <sup>0</sup><br>50 mol Ni <sup>0</sup><br>100 mol NaOH                                                             | 423 \$                           | [27-59]    |
| Chemical reduction<br>Raney Al-Ni                                                      | 100 mol Al <sup>0</sup><br>used in Al-Ni<br>100 mol NaOH                                                                      | 1686 \$                          | [28,60]    |
| Chemical reduction<br>Al <sup>0</sup> powder<br>+ Raney Al-Ni                          | 120 mol Al <sup>0</sup><br>480 mol NaOH<br>44 mol Al <sup>0</sup> (in Al-Ni)<br>480 mol NaOH                                  | 1340 \$                          | [57,58,59] |
| Chemical reduction<br>NaBH <sub>4</sub>                                                | 132 mol NaBH <sub>4</sub>                                                                                                     | 735 \$                           | [61]       |
| Chemical reduction<br>NaBH <sub>4</sub> /Na <sub>2</sub> S <sub>2</sub> O <sub>5</sub> | 66 mol NaBH <sub>4</sub><br>+ 66 mol Na <sub>2</sub> S <sub>2</sub> O <sub>5</sub><br>+ 18 mol H <sub>2</sub> SO <sub>4</sub> | 614 \$                           | [52,61,62] |

\* Costs demonstrated the lowest available price according to global market suppliers [52-62].

**Figure S1.** The dependence of decoloration efficiency/COD removal on pH value for Fenton reaction using 6 mmol  $\text{H}_2\text{O}_2$  + 0.2 mmol  $\text{FeSO}_4$  per 0.05 mmol of MB9 in 200 mL  $\text{H}_2\text{O}$  (reaction time 20 hours).

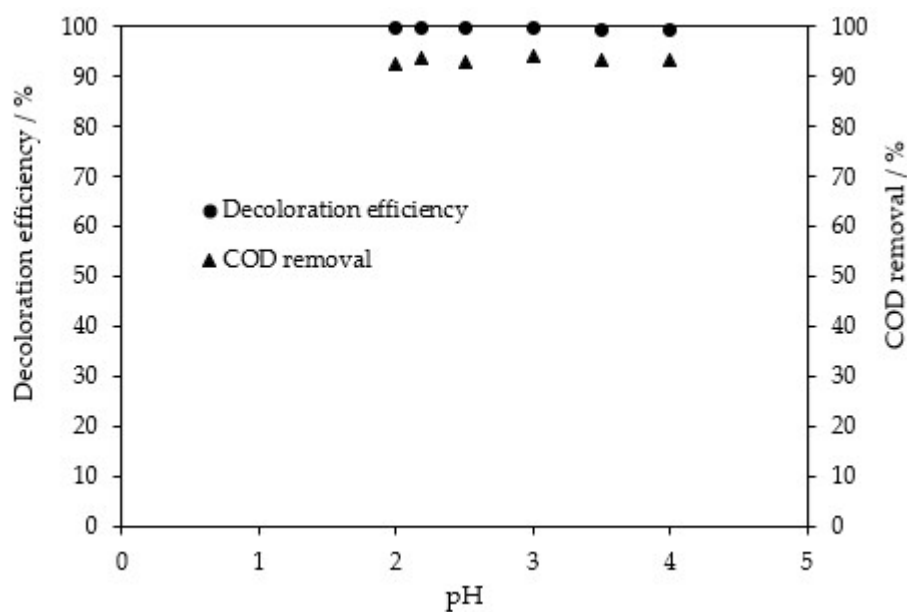

**Figure S2.** LC chromatogram of LC-MS analysis of reaction mixture obtained after reductive degradation of MB9 using Al-Ni/NaOH.

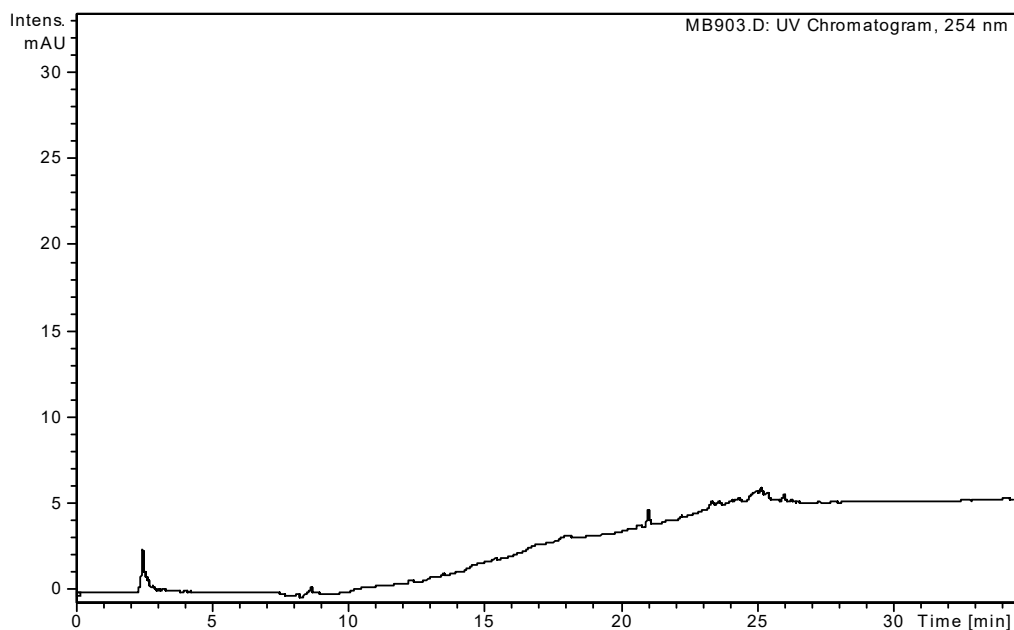

No components that may contain a chlorine atom in their molecule were identified in the sample, see Figure S2 above.

Note: Structures of the detected isomer compounds were not possible to confirm due to a lack of corresponding standard compounds.

**Figure S3. (a)** LC chromatogram of LC-MS analysis of reaction mixture obtained after reductive degradation of MB9 using  $\text{NaBH}_4/\text{Na}_2\text{S}_2\text{O}_5$ .

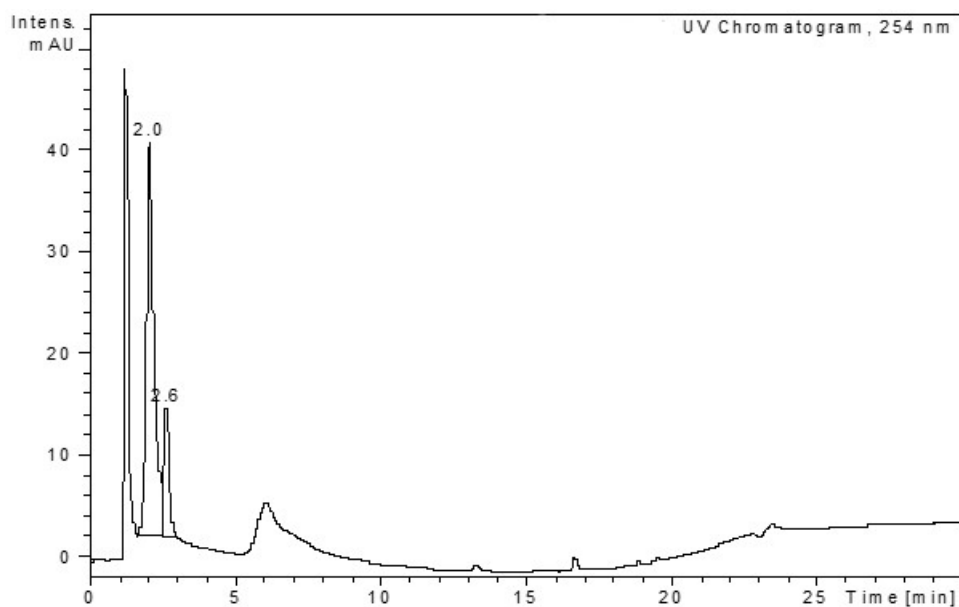

**(b)** Qualitative LC-MS analysis of reaction mixture obtained after reductive degradation of MB9 using  $\text{NaBH}_4/\text{Na}_2\text{S}_2\text{O}_5$ .

| <i>RT (min)</i> | <i>MW</i> | <i>Structure</i>         |
|-----------------|-----------|--------------------------|
| 2               | 636       | Non-chlorinated compound |
| 2.6             | 223       |                          |

Note: Structures of the detected isomer compounds were not possible to confirm due to a lack of corresponding standard compounds.

**(c)** Mass spectrums (EI, 70 eV) of analyzed components.

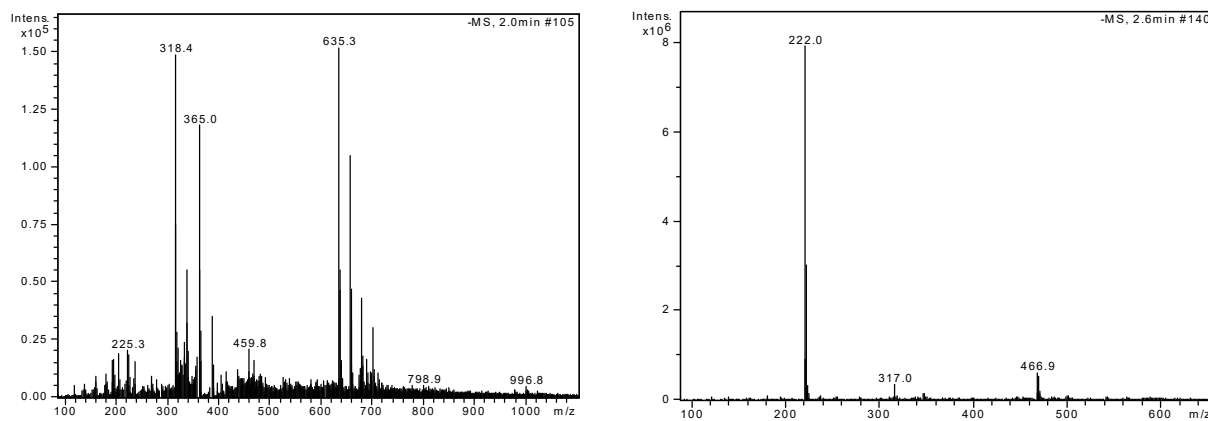

Supplement: s1 [file s1 › catalysts-2177589-supplementary.pdf]
